# Supplementary material for: Screening for Health-Promoting Fatty Acids in Ascidians and Seaweeds Grown under the Influence of Fish Farming Activities
Source: MDPI journal article supplement (doi:10.3390/md19080469), 2021-08-22
Supplement: s1 [file s1]

# Screening for health-promoting fatty acids in ascidians and seaweeds grown under the influence of fish farming activities

Luísa Marques<sup>1\*</sup>, M. Rosário Domingues<sup>2,3</sup>, Elisabete da Costa<sup>2,3</sup>, Maria Helena Abreu<sup>4</sup>, Ana Isabel Lillebø<sup>1</sup>, Ricardo Calado<sup>1,\*</sup>

<sup>1</sup> ECOMARE, CESAM - Centre for Environmental and Marine Studies, Department of Biology, University of Aveiro, Santiago University Campus, 3810-193 Aveiro, Portugal; luisa.marques@ua.pt (L.M.); lillebo@ua.pt (A.L.) rjcalado@ua.pt (R.C.)

<sup>2</sup> CESAM - Centre for Environmental and Marine Studies, Department of Chemistry, University of Aveiro, Santiago University Campus, 3810-193 Aveiro, Portugal; mrd@ua.pt (M.R.D.) elisabetecosta@ua.pt (E.d.C.)

<sup>3</sup> Mass Spectrometry Centre, LAQV-REQUIMTE, Department of Chemistry, University of Aveiro, Santiago University Campus, 3810-193 Aveiro, Portugal

<sup>4</sup> ALGAplus - Production and Trading of Seaweed and Derived Products Lda., 3830-196 Ílhavo, Portugal; helena.abreu@algaplus.pt

\* Correspondence: luisa.marques@ua.pt; +351 967 676 182 (LM); rjcalado@ua.pt; +351 917 989 010 (RC)

## Supplementary Information (SI)

**Table SI1:** Fatty acid profile of ascidians (Ascidacea) and seaweeds (sea lettuce, *Ulva* spp. and bladderwrack, *Fucus* sp.) sampled in locations with *versus* without the influence of organic-rich effluents from fish farming activities (+Org or -Org, respectively), as well as the formulated fish feed (FF) most commonly supplied in fish farming activities in the study location. Values are expressed as a percentage of the total pool of fatty acids and are averages of five replicates (n=5)  $\pm$  SD. BCFA: Branched fatty acids, SFA: saturated fatty acids, MUFA: monounsaturated fatty acids, PUFA: polyunsaturated fatty acids. n.d: not detected.

|                               | Ascidacea        |                  | <i>Ulva</i> spp. |                  | <i>Fucus</i> sp. |                  | Fish Feed        |
|-------------------------------|------------------|------------------|------------------|------------------|------------------|------------------|------------------|
|                               | +Org             | -Org             | +Org             | -Org             | +Org             | -Org             |                  |
| <i>iso</i> 14:0               | 0.16 $\pm$ 0.02  | 0.09 $\pm$ 0.02  | n.d              | n.d              | n.d              | n.d              | n.d              |
| 14:0                          | 0.94 $\pm$ 0.17  | 1.45 $\pm$ 0.12  | 0.68 $\pm$ 0.22  | 0.64 $\pm$ 0.17  | 8.04 $\pm$ 0.64  | 8.47 $\pm$ 0.27  | 1.53 $\pm$ 0.35  |
| <i>iso</i> 15:0               | 1.44 $\pm$ 0.20  | 2.14 $\pm$ 0.15  | n.d              | n.d              | n.d              | n.d              | n.d              |
| <i>anteiso</i> 15:0           | 0.74 $\pm$ 0.13  | 0.27 $\pm$ 0.03  | n.d              | n.d              | n.d              | n.d              | n.d              |
| 15:0                          | 1.07 $\pm$ 0.18  | 0.61 $\pm$ 0.06  | n.d              | n.d              | n.d              | n.d              | n.d              |
| 15:1                          | 0.28 $\pm$ 0.06  | 0.34 $\pm$ 0.04  | n.d              | n.d              | n.d              | n.d              | n.d              |
| <i>iso</i> 16:0               | 0.59 $\pm$ 0.07  | 0.84 $\pm$ 0.04  | n.d              | n.d              | n.d              | n.d              | n.d              |
| <i>anteiso</i> 16:0           | 0.12 $\pm$ 0.03  | 0.05 $\pm$ 0.01  | n.d              | n.d              | n.d              | n.d              | n.d              |
| 16:0                          | 11.50 $\pm$ 1.31 | 12.56 $\pm$ 0.67 | 37.74 $\pm$ 1.14 | 38.05 $\pm$ 1.86 | 16.17 $\pm$ 1.29 | 15.03 $\pm$ 0.62 | 17.25 $\pm$ 0.68 |
| 16:1                          | 0.36 $\pm$ 0.09  | 0.26 $\pm$ 0.05  | n.d              | n.d              | n.d              | n.d              | n.d              |
| 16:1 <i>n</i> -7              | 0.22 $\pm$ 0.03  | 0.38 $\pm$ 0.03  | 2.32 $\pm$ 0.43  | 2.21 $\pm$ 0.40  | 1.03 $\pm$ 0.04  | 1.46 $\pm$ 0.09  | 0.34 $\pm$ 0.04  |
| 16:1 <i>n</i> -9              | 5.78 $\pm$ 0.62  | 5.37 $\pm$ 0.29  | 3.33 $\pm$ 0.27  | 2.67 $\pm$ 0.27  | 0.25 $\pm$ 0.04  | 0.29 $\pm$ 0.03  | 3.62 $\pm$ 0.18  |
| 16:2                          | n.d              | n.d              | 0.47 $\pm$ 0.13  | 0.13 $\pm$ 0.01  | n.d              | n.d              | n.d              |
| 16:2 <i>n</i> -6              | 0.13 $\pm$ 0.03  | 0.16 $\pm$ 0.03  | n.d              | n.d              | 0.05 $\pm$ 0.01  | 0.30 $\pm$ 0.08  | 0.10 $\pm$ 0.02  |
| 16:3 <i>n</i> -3              | n.d              |
| 16:4 <i>n</i> -3              | n.d              | n.d              | 5.18 $\pm$ 0.33  | 4.27 $\pm$ 0.67  | 0.59 $\pm$ 0.06  | 0.59 $\pm$ 0.05  | n.d              |
| <i>iso</i> 17:0               | 0.69 $\pm$ 0.08  | 1.51 $\pm$ 0.11  | n.d              | n.d              | n.d              | n.d              | n.d              |
| <i>anteiso</i> 17:0           | 0.45 $\pm$ 0.05  | 0.48 $\pm$ 0.02  | n.d              | n.d              | n.d              | n.d              | n.d              |
| 17:0                          | 0.64 $\pm$ 0.06  | 1.23 $\pm$ 0.12  | n.d              | n.d              | n.d              | n.d              | n.d              |
| 17:1                          | 0.26 $\pm$ 0.06  | 0.11 $\pm$ 0.01  | n.d              | n.d              | n.d              | n.d              | n.d              |
| 17:1 <i>n</i> -9              | 0.56 $\pm$ 0.10  | 0.28 $\pm$ 0.02  | n.d              | n.d              | n.d              | n.d              | n.d              |
| methyl-heptadecanoate         | 0.40 $\pm$ 0.09  | 0.10 $\pm$ 0.01  | n.d              | n.d              | n.d              | n.d              | n.d              |
| 18:0                          | 4.87 $\pm$ 1.23  | 5.89 $\pm$ 0.53  | 6.58 $\pm$ 3.99  | 8.70 $\pm$ 2.29  | 4.34 $\pm$ 1.61  | 1.77 $\pm$ 0.16  | 6.51 $\pm$ 1.09  |
| 18:1 <i>n</i> -7+ <i>n</i> -9 | 20.27 $\pm$ 1.80 | 11.98 $\pm$ 0.95 | 15.23 $\pm$ 1.21 | 15.19 $\pm$ 1.22 | 26.50 $\pm$ 2.28 | 21.34 $\pm$ 1.51 | 35.97 $\pm$ 0.43 |

|                     |              |              |              |              |              |              |              |
|---------------------|--------------|--------------|--------------|--------------|--------------|--------------|--------------|
| 18:2                | 1.19 ± 0.09  | 0.62 ± 0.09  | n.d          | n.d          | n.d          | n.d          | n.d          |
| 18:2 <i>n</i> -6    | 5.85 ± 1.62  | 2.26 ± 0.08  | 4.41 ± 0.19  | 2.74 ± 0.41  | 6.82 ± 0.38  | 7.45 ± 0.21  | 16.86 ± 0.19 |
| 18:3 <i>n</i> -6    | 0.07 ± 0.02  | 0.29 ± 0.03  | 0.59 ± 0.07  | 0.71 ± 0.05  | 0.48 ± 0.03  | 0.46 ± 0.02  | 0.18 ± 0.02  |
| 18:3 <i>n</i> -3    | 2.16 ± 0.22  | 2.38 ± 0.48  | 8.95 ± 0.70  | 7.85 ± 0.57  | 6.96 ± 0.41  | 8.87 ± 0.51  | 2.85 ± 0.07  |
| 18:4 <i>n</i> -3    | 1.54 ± 0.61  | 3.61 ± 0.69  | 9.72 ± 0.65  | 10.1 ± 0.72  | 3.70 ± 0.36  | 5.55 ± 0.62  | 0.62 ± 0.05  |
| 20:0                | 0.41 ± 0.04  | 0.53 ± 0.04  | n.d          | n.d          | 0.36 ± 0.03  | 0.31 ± 0.04  | 0.27 ± 0.03  |
| 20:1                | 0.37 ± 0.17  | 0.16 ± 0.04  | n.d          | n.d          | n.d          | n.d          | n.d          |
| 20:1 <i>n</i> -9    | 4.90 ± 0.57  | 1.06 ± 0.08  | n.d          | n.d          | 0.31 ± 0.04  | 0.26 ± 0.03  | 2.38 ± 0.06  |
| 20:1 <i>n</i> -7    | n.d          | n.d          | n.d          | n.d          | n.d          | n.d          | 0.22 ± 0.02  |
| 20:2                | 0.20 ± 0.04  | 0.16 ± 0.01  | n.d          | n.d          | n.d          | n.d          | n.d          |
| 20:2 <i>n</i> -6    | n.d          | n.d          | n.d          | n.d          | 0.33 ± 0.01  | 0.31 ± 0.06  | 0.49 ± 0.03  |
| 20:3 <i>n</i> -6    | 0.23 ± 0.04  | 0.35 ± 0.04  | n.d          | n.d          | 0.66 ± 0.04  | 0.64 ± 0.09  | n.d          |
| 20:3 <i>n</i> -3    | n.d          | n.d          | n.d          | n.d          | n.d          | n.d          | 0.18 ± 0.03  |
| 20:4 <i>n</i> -6    | 2.43 ± 0.37  | 3.11 ± 0.27  | n.d          | n.d          | 14.08 ± 1.17 | 15.03 ± 0.22 | 0.47 ± 0.03  |
| 20:4 <i>n</i> -3    | 0.74 ± 0.06  | 0.76 ± 0.17  | 0.51 ± 0.07  | 0.50 ± 0.03  | 0.23 ± 0.02  | 0.28 ± 0.05  | 0.36 ± 0.03  |
| 20:5 <i>n</i> -3    | 17.77 ± 2.90 | 20.44 ± 1.00 | 0.61 ± 0.13  | 1.25 ± 1.14  | 7.66 ± 0.74  | 9.95 ± 0.39  | 2.13 ± 0.11  |
| 21:0                | 0.09 ± 0.01  | 0.12 ± 0.02  | n.d          | n.d          | n.d          | n.d          | 0.05 ± 0.02  |
| 22:0                | n.d          | n.d          | 1.31 ± 0.21  | 1.39 ± 0.26  | 0.12 ± 0.02  | 0.12 ± 0.01  | 0.11 ± 0.02  |
| 22:1 <i>n</i> -11   | n.d          | n.d          | n.d          | n.d          | n.d          | n.d          | 1.94 ± 0.20  |
| 22:1 <i>n</i> -9    | n.d          | n.d          | n.d          | n.d          | 0.37 ± 0.03  | 0.35 ± 0.05  | 0.29 ± 0.05  |
| 22:4                | 0.24 ± 0.04  | 0.41 ± 0.05  | n.d          | n.d          | n.d          | n.d          | n.d          |
| 22:4                | 0.13 ± 0.02  | 0.29 ± 0.04  | n.d          | n.d          | n.d          | n.d          | n.d          |
| 22:5 <i>n</i> -6    | 0.31 ± 0.05  | 0.76 ± 0.12  | n.d          | n.d          | n.d          | n.d          | n.d          |
| 22:5 <i>n</i> -3    | 1.07 ± 0.10  | 1.03 ± 0.07  | 2.38 ± 0.31  | 3.64 ± 0.47  | n.d          | n.d          | 0.69 ± 0.06  |
| unknown             | n.d          | 0.58 ± 0.23  | n.d          | n.d          | n.d          | n.d          | n.d          |
| 22:6 <i>n</i> -3    | 8.75 ± 1.00  | 11.85 ± 1.01 | n.d          | n.d          | n.d          | n.d          | 4.59 ± 0.32  |
| 24:0                | n.d          | n.d          | n.d          | n.d          | 0.33 ± 0.05  | 0.31 ± 0.03  | n.d          |
| 24:1 <i>n</i> -9    | n.d          | n.d          | n.d          | n.d          | 0.62 ± 0.05  | 0.72 ± 0.07  | n.d          |
| $\sum n-3$          | 32.03 ± 3.62 | 40.07 ± 1.54 | 27.35 ± 1.87 | 27.61 ± 2.30 | 19.16 ± 1.54 | 25.24 ± 1.42 | 11.43 ± 0.51 |
| $\sum n-6$          | 9.02 ± 1.25  | 6.94 ± 0.46  | 5.00 ± 0.24  | 3.45 ± 0.44  | 22.42 ± 1.59 | 24.18 ± 0.07 | 18.09 ± 0.23 |
| $\sum n-3/\sum n-6$ | 3.66 ± 0.98  | 5.79 ± 0.37  | 5.46 ± 0.25  | 8.04 ± 0.36  | 0.85 ± 0.03  | 1.04 ± 0.06  | 0.63 ± 0.03  |
| $\sum$ BCFA         | 4.59 ± 0.53  | 5.48 ± 0.33  | n.d          | n.d          | n.d          | n.d          | n.d          |
| $\sum$ SFA          | 19.52 ± 2.36 | 22.39 ± 1.00 | 46.30 ± 3.35 | 48.78 ± 3.37 | 29.35 ± 3.48 | 26.02 ± 0.50 | 25.72 ± 1.42 |
| $\sum$ MUFA         | 32.99 ± 0.92 | 19.95 ± 1.39 | 20.88 ± 1.62 | 20.07 ± 1.66 | 29.07 ± 2.32 | 24.42 ± 1.48 | 44.77 ± 0.81 |
| $\sum$ PUFA         | 42.81 ± 2.65 | 48.48 ± 1.80 | 32.82 ± 1.94 | 31.19 ± 2.73 | 41.58 ± 3.08 | 49.43 ± 1.42 | 29.52 ± 0.64 |

**Table SI2:** Summary of the environmental parameters measured at the time of sampling in locations with *versus* without the influence of organic-rich waters from fish farming activities (+Org or -Org, respectively). Values are expressed as a percentage and are averages of three replicates (n=6)  $\pm$  SD.

| Oxygen (mg/L)    |                | Salinity         |                | Temperature (°C) |                | pH               |               |
|------------------|----------------|------------------|----------------|------------------|----------------|------------------|---------------|
| +Org             | -Org           | +Org             | -Org           | +Org             | -Org           | +Org             | -Org          |
| 10.1             | 15.9           | 33.9             | 25.7           | 16.7             | 16.4           | 8.10             | 9.14          |
| 9.9              | 12.2           | 33.8             | 25.5           | 16.5             | 17.1           | 8.16             | 9.06          |
| 8.3              | 13.2           | 33.2             | 33.5           | 15.4             | 17.0           | 8.20             | 8.95          |
| 8.3              | 9.4            | 33.8             | 25.6           | 15.4             | 16.9           | 8.22             | 9.07          |
| 13.6             | 13.0           | 33.2             | 33.5           | 16.7             | 17.2           | 8.58             | 9.29          |
| 12.7             | 12.7           | 33.9             | 25.8           | 16.6             | 17.0           | 8.61             | 9.10          |
| Average $\pm$ SD |                | Average $\pm$ SD |                | Average $\pm$ SD |                | Average $\pm$ SD |               |
| 10.5 $\pm$ 2.2   | 12.7 $\pm$ 2.1 | 33.6 $\pm$ 0.3   | 28.3 $\pm$ 4.1 | 16.2 $\pm$ 0.6   | 16.9 $\pm$ 0.3 | 8.3 $\pm$ 0.2    | 9.1 $\pm$ 0.1 |

**Table SI3:** Nutritional composition of the formulated fish feed provided to the fish at the fish farming location (+Org).

SORGAL, SOCIEDADE DE ÓLEOS E RAÇÕES, SA

#### **Standard orange 4**

Seabass; Gilthead Seabream; Complete Animal Feed; From 50g to 150g

#### **Analytical Constituents**

Crude Protein 43.0%; Crude Fat 17.0%; Crude Ash 10.0%; Crude Fiber 3.0%; Calcium 1.9%; Phosphorus 1.4%; Sodium 0.4%

#### **Additives (per kg of feed)**

##### **Vitamins, pro-vitamins and chemically well-defined substances having similar affect:**

3a672a - Vitamin A 5.000 UL; E671 - Vitamin D3 1.000 UL; 3a700 – All rac alfa-tocoferyl acetate 200 UL; 3a312 – Vitamin C (Ascorbil Monophospahte) 100 mg;

##### **Compounds of trace elements**

**E1 – Fe** - ferrous chelate of Glycine 2.0 mg; **3b202 – I** – Calcium iodate anhydrous 1.1 mg; **E4 – Cu** – Cupric chelate of amino acids, hydrate 12.0 mg; **E5 – Mn** – Manganese and amino acids chelate, hydrate 32.0 mg; **3b606 – Zn** – Zinc and amino acids chelate, hydrate 48.0 mg; **3b815 – Se** – L-Selenomethionine 0.1 mg

##### **Amino acids, their salts and analogues**

**3.2.2 - L** – Lysine monohydrochloride 2.5 g; **3a301** – DL Methionine 3.0 g

##### **Antioxidants**

**E310** – 0.39 mg; **E320 + E321** – 100 mg

##### **Anticaking agent**

**E562** – 395 mg; **1m558** – 382 mg

##### **Ingredients**

**10.4.2** Fish meal; **1.11.1** Wheat; **9.4.1** Processed animal protein (non ruminants)

**9.11.1** Feather meal; **2.18.4** Soy (bean) meal, dehulled; **10.4.6** Fish Oil; **2.19.4** Sunflower seed meal, dehulled; **3.7.4** Horse bean, dehulled; **9.7.1** Non ruminant blood meal; **9.2.1** Poultry fat; **10.4.4** Fish protein, hydrolysed; **1.2.8** Corn gluten meal; **12.1.4** Bacterial protein from *Corynebacterium glutamicum*; **11.3.3** Monocalcium phosphate; **12.1.5** Brewer's yeast; **12.2** Other fermentation by-products

Contains fish meal, non ruminant blood products and processed animal products – not to be used with ruminants. Not to be used with farming animals, except aquaculture feeds and fur animals.

Store cool and dry, away from direct sunlight
